1 **Title Page:**

2 **Effect of adiposity on leukocyte telomere length in US adults by race/ethnicity: The**

3 **National Health and Nutrition Examination Survey**

4 **Short title:**

5 **Adiposity and leukocyte telomere by race/ethnicity in the US**

6 **Author list:**

7 <sup>1</sup>Sharon K. Davis, PhD (Corresponding author)

8 <sup>1</sup>Ruihua Xu, PhD

9 <sup>1</sup>Rumana J. Khan, PhD

10 <sup>2</sup>Amadou Gaye, PhD

11 <sup>3</sup>Yie Liu, PhD

12 **1**National Institutes of Health, National Human Genome Research Institute, Social Epidemiology  
13 Research Unit, Bethesda, MD, United States of America, **2** National Institutes of Health,  
14 National Human Genome Research Institute, Cardiovascular Disease Section, Bethesda, MD,  
15 United States of America, **3**National Institutes of Health, National Institute of Aging, Section for  
16 Telomere Maintenance, Baltimore, MD, United States of America

17

18 **Abstract**

19 **Objective**

20 Obesity is associated with telomere attrition – a marker of cellular and biological aging. The US  
21 has the highest proportion of obesity and is comprised of a racially/ethnic diverse population.

22 Little is known about the relationship between obesity and telomere attrition according to  
23 race/ethnicity in the US. Our objective is to examine the differential association.

## 24 **Design and setting**

25 The effect of body mass index (BMI), % total body fat (TBF) and waist circumference (WC) on  
26 leukocyte telomere length (LTL) were examined as adiposity measures according to  
27 race/ethnicity and sex specific race/ethnicity using separate adjusted linear regressions on a  
28 sample of 4,919 respondents aged 20-84 years from cross-sectional 1999-2002 data using the US  
29 National Health and Nutrition Examination Survey. Mediation analyses assessed health  
30 behaviors associated with relationship between adiposity measures and LTL.

## 31 **Main outcome measure**

32 LTL

## 33 **Results**

34 African Americans (AA) experienced a 28% and 11% decrease in LTL associated with  
35 increasing BMI and WC, ( $p=.02$  and  $.03$ ) respectively. Mexican Americans (MA) experienced a  
36 33% decrease in LTL associated with increasing %TBF ( $p=.04$ ). Whites experienced a 19%,  
37 23%, and .08% decrease in LTL associated with increasing BMI, %TBF, and WC, ( $p=.05$ ,  $.003$ ,  
38  $.02$ ) respectively. White men experienced a 26% decrease in LTL due to increasing BMI ( $p=.05$ ).  
39 AA women experienced a 41%, 44%, and 16% decrease in LTL due to increasing BMI, %TBF,  
40 and WC, respectively ( $p=.007$ ,  $.02$ ,  $.04$ ). White women experienced a 29% decrease in LTL  
41 associated with increasing %TBF ( $p=.006$ ). Selected health behaviors were associated with the  
42 relationship between adiposity measures and LTL.

## 43 **Conclusion**

44 Overall, AA and Whites have worse cellular and biological aging related to collective adiposity  
45 measures. According to sex, AA women experienced more deleterious cellular and biological

46 aging. Findings suggest tailored interventions to improve adverse behaviors that contribute to  
47 obesity may improve telomere attrition in US adults.

## 48 **Introduction**

49       Secular rates of risk factors associated with cardiovascular disease (CVD) have been  
50 declining among US adults across all racial/ethnic groups.[1] Obesity rates, on the other hand,  
51 have increased. [2] Worldwide obesity has nearly tripled since 1975.[3] The US has the highest  
52 proportion of obesity.[2] More than one-third of US adults are obese.[4] Prevalence rates differ  
53 by race/ethnicity and by sex according to race/ethnicity.[4] Obesity is a major risk factor for  
54 many age-related CVD chronic conditions such as hypertension, type 2 diabetes and  
55 dyslipidemia which increases the risk for heart failure, heart attack and stroke.[5] It is the leading  
56 cause of preventable deaths globally and occurs, in part, due to adverse modifiable lifestyle  
57 behaviors such as sedentary physical activity and unhealthy diet.[3]

58       Telomeres are the DNA-protein complex at the ends of chromosomes.[6] It consists of  
59 highly conserved tandem hexameric nucleotide repeats (TTAGGG). Telomere are needed for the  
60 replication of DNA and provides protection to chromosomes from nuclease degradation and  
61 cellular senescence which promotes the integrity and stability of chromosomes. During the  
62 cellular process, telomeres progressively shorten with each cell division. When telomeres shorten  
63 to a critical length, replicative senescence is triggered resulting in cell-cycle arrest.[7] In human  
64 peripheral leukocytes, telomere shortening has been demonstrated to be a maker for cellular and  
65 biologic aging as well as a biomarker for age-related diseases such as CVD.[8] Evidence shows  
66 that the pathways through which obesity promotes morbidities include increasing systemic  
67 inflammation and oxidative stress; inflammation and oxidative stress have also been linked to  
68 telomere attrition.[9-11] Studies have investigated the relationship between adiposity and

69 telomere length. Such studies have produced equivocal results [12-20]. Studies have also  
70 examined the association between adverse lifestyle health behaviors and telomere length with  
71 similar mixed results. [19, 21-26] One factor that may account for these conflicting findings may  
72 be inadequate statistical power due to small sample size, study design, and sample  
73 characteristics. Little is known about racial/ethnic differences between adiposity and telomere  
74 length. In addition, we are unaware of any studies that have investigated adverse health  
75 behaviors as a pathway associated with adiposity and telomere length. The objective of our  
76 research was to examine a large US representative, socioeconomically and racially/ethnic diverse  
77 population. This represents the first study to examine adiposity and telomere length according to  
78 race/ethnicity, sex according to race/ethnicity and mediating pathways due to adverse lifestyle in  
79 the US. We hypothesize that the association between telomere length and adiposity will be  
80 moderated by race/ethnicity and sex. We further hypothesize that adverse health behaviors will  
81 have a mediating effect between adiposity and telomere length. Findings will provide important  
82 information about the rate of biological aging due to telomere length and adiposity across major  
83 race/ethnic groups in the US and according to corresponding sex; as well as the implications  
84 associated with adverse health behaviors.

## 85 **Materials and Methods**

### 86 **Study design and sampling procedures**

87 Data was collected from the 1999-2000 and 2001-2002 cycles of the National Health and  
88 Nutrition Examination Survey (NHANES). This is a nationally representative cross-sectional  
89 survey and physical examination of civilian, noninstitutionalized US population conducted by  
90 the US Centers for Disease Control and Prevention (CDC) since 1960.[27] NHANES utilizes a  
91 4- stage sampling design which includes 1) primary sampling units (PSUs) consisting of single

92 counties, 2) area segments within PSUs, 3) households within segment areas, and 4) persons  
93 within households. On average 2-3 individuals per household were sampled. NHANES 1999-  
94 2002 oversampled low-income individuals, African Americans and Mexican Americans to  
95 obtain more accurate estimates in these populations. All respondents aged  $\geq 20$  during this period  
96 were asked to provide DNA specimens to establish a national probability sample of genetic  
97 material for future research. DNA from the most recent NHANES is only available in the form  
98 of crude lysates of cell lines thereby precluding the assay of leukocyte telomere length (LTL).  
99 However, DNA collected during 1999-2002 is purified from whole blood thus facilitating the  
100 assay of LTL. Pooled data were available for public download  
101 ([http://www.cdc.gov/nchs/nhanes\\_questionnaires.htm](http://www.cdc.gov/nchs/nhanes_questionnaires.htm)).

102 Of the 10,291 respondents eligible to provide DNA, 7,825 provided DNA and consented  
103 to future genetic research. We excluded 653 respondents whose self-reported race/ethnicity was  
104 “other” or “other Hispanic,” since our goal was to examine more discrete self-reported  
105 race/ethnic groups (i.e. White, African American, Mexican American). We also excluded 225  
106 respondents aged  $\geq 85$  because of survival bias among the extreme elderly.[28] An additional  
107 2,037 were excluded due to missing data on one or more variables in the models - resulting in a  
108 final sample size of 4,919. There were no significant sociodemographic differences between the  
109 full sample and the final sample. Sampling weights were used to address oversampling and non-  
110 response bias and to ensure that estimates are representative of the general US population.  
111 Written informed consent was obtained from each participant. Human subject approval was  
112 provided by the Institutional Review Board (IRB) at the CDC and the study protocol was  
113 approved by the IRB of the National Institutes of Health.

#### 114 **Data and data collection**

115 Aliquots of purified DNA were provided by the laboratory of the CDC. DNA was  
116 isolated from whole blood using the Puregene (D-50K) kit protocol and stored at  $-80^{\circ}$ . The LTL  
117 assay was performed in the laboratory of Dr. Elizabeth Blackburn at the University of California,  
118 San Francisco, using the quantitative polymerase chain reaction (PCR) method to measure  
119 telomere length relative to standard reference DNA (T/S ratio).[29] The single-copy gene was  
120 used as a control to normalize input DNA was human beta-globin. Each sample was assayed  
121 twice. T/S ratios that fell into the 7% variability range were accepted; the average of the two was  
122 taken as the final value. A third assay was run for samples with greater than 7% variability and  
123 the average of the two closest T/S values was used. The inter-assay coefficient of variation was  
124 4.4%.

125 Body mass index (BMI), estimated % total body fat, and waist circumference were  
126 analyzed separately as measures of adiposity. BMI was calculated as weight in kilograms divided  
127 by height in meters squared ( $\text{kg}/\text{m}^2$ ) using a calibrated electronic digital scale and a stadiometer.  
128 Estimated % total body fat was assessed using dual-energy X-ray absorptiometry of the whole  
129 body that lasted 3 minutes (Hologic scanner, QDR-4500, Bedford, MA, USA). Total % body fat  
130 was calculated as total body fat mass divided by total mass x 100. Waist circumference was  
131 measured in centimeters using a tape measure around the trunk, at the iliac crest, crossing at the  
132 mid-axillary line. The details of these assays have been described elsewhere.[30]

133 Adverse health behaviors were assessed as pathway mediators between adiposity  
134 exposures and LTL outcome; these include smoking, drinking, physical activity, and diet.  
135 Smoking was measured a cumulative exposure to tobacco smoke in pack-years, calculated as the  
136 average number of cigarettes smoked per day times the number of years smoked divided by 20  
137 (number of cigarettes in one pack).[31] Dummy variables were 30= $\Rightarrow$ 59 pack years, <30 pack

138 years, and never smoked was coded as the reference. Drinking was based on daily alcohol  
139 consumption defined as heavy, moderate and abstainer.[27] Heavy drinkers were defined as  
140 women reporting having drunk  $\geq 2$  alcoholic beverages in the past 12 months per day and men  
141 reporting having drunk  $\geq 3$  alcoholic beverages in the past 12 months per day. Moderate drinkers  
142 were defined as women reporting  $< 2$  drinks per day in the past 12 months and men reporting  $< 3$   
143 drinks per day in the past 12 months. Men and women reporting no alcoholic beverages in the  
144 past 12 months per day were the reference and defined as abstainers. Physical activity was based  
145 on guidelines provided by the Department of Health and Human Services.[32] Respondents met  
146 or exceeded recommended guidelines if they reported  $\geq 150$ - $\geq 300$  minutes per week of physical  
147 activity, such as brisk walking, gardening, and muscle-strengthening based on total number of  
148 minutes reported for each activity. Those reporting  $< 150$  minutes of physical activity per week  
149 were below the recommended guidelines. Diet was based on The Healthy Eating Index (HEI)  
150 developed by the US Department of Agriculture in 2005.[33] The score is the sum of 10  
151 components representing different aspects of a healthy diet. Each component of the index has a  
152 maximum score of 10 and a minimum score of zero. The maximum overall score for the 10  
153 components combined is 100. An overall index score  $\geq 80$  implies a “good” diet, an index score  
154 between  $\geq 51$  and 80 implies a diet that “needs improvement,” and an index score  $< 51$  implies a  
155 “poor” diet.

156 Race/ethnicity was based on self-reported non-Hispanic White, non-Hispanic Black and  
157 Mexican American thereto referred to as White, African American and Mexican American.  
158 Confounding demographic variables that may affect the relationship between adiposity and  
159 telomere length included age in years at the time of the survey, age<sup>2</sup>, sex, socioeconomic status  
160 based on Poverty Income Ratio (PIR), adiposity related health outcomes, markers of

161 inflammation and oxidative stress, and characteristics of the blood from which DNA was  
162 extracted. PIR was calculated as the ratio of income to the poverty threshold for a household of  
163 a given size and composition. PIR values below 1.00 are below the official poverty threshold as  
164 defined by the US Census Bureau.[34] Adiposity related health status was based on respondents  
165 answer to the questions “have you ever been told by a doctor or other health professional that  
166 you had hypertension, also called high blood pressure and “have you ever been told by a doctor  
167 or health professional that you have diabetes or sugar diabetes?” Markers of inflammation and  
168 oxidative stress included C-reactive protein (CRP) and gamma glutamyltransferase (GGT)  
169 measured from serum. Characteristics of the blood samples from which DNA was extracted  
170 included white blood cells ( $\mu\text{L}$ ), lymphocytes (%), monocytes (%), neutrophils (%), eosinophils  
171 (%), and basophils (%).

## 172 **Statistical methods**

173 Descriptive analysis was performed stratified by total sample, African American,  
174 Mexican American and White according to study variables. Continuous variables are presented  
175 as means  $\pm$  standard deviation based on ANOVA and categorical variables as percent based on  
176 chi-square. Leukocyte telomere length was log-transformed by natural logarithm prior to  
177 modeling. Multivariate linear regression models were fitted to assess the relationship between  
178 LTL and each adiposity measure. We report the percentage change in the average value of  
179 telomere length for a one-unit change in a predictor variable based on the beta estimate for  
180 telomere length as the outcome. All regression models accommodated the complex sampling  
181 design of NHANES by incorporating strata and PSU indicators, as well as sample weights for the  
182 genetic subsample.[35] We first compared the association between LTL and each adiposity  
183 measures stratified by each race/ethnic group. We then stratified separately by sex according to

184 race/ethnic group. The models for stratified race/ethnic groups was adjusted for age, age<sup>2</sup>, sex,  
185 PIR, hypertension status, type 2 diabetes status, CRP, GGT, white blood cells, lymphocytes,  
186 monocytes, neutrophils, eosinophils, and basophils. Sex, hypertension status and type 2 diabetes  
187 status were entered as categorical variables. Age, age<sup>2</sup>, PIR, CRP, GGT and the characteristics  
188 of blood was entered as continuous variables. The use of age along with a age<sup>2</sup> term is important  
189 when analyzing LTL given the strength of its association with age and the potential for  
190 nonlinearity in this association. The models stratified by men and women according to  
191 race/ethnicity included the same adjustments as those for the race/ethnicity models – excluding  
192 sex.

193 To assess the moderating effect of race/ethnicity and sex, we entered an interaction term  
194 for each adiposity measure in a total aggregate model. We also examined moderating effects by  
195 assessing stratified models separately according to race/ethnicity and sex by comparing  
196 corresponding parameter estimate across race/ethnic groups and sex using z-test (African  
197 American versus White, African American versus Mexican American, White versus Mexican  
198 American, men versus women). A significant z-test suggest moderating effects of race/ethnicity  
199 and sex.[36] The mediating effect of each adverse behavior between adiposity measure and LTL  
200 was tested separately with a series of regression models using methodological extensions to  
201 accommodate categorical mediators.[37, 38] Models included confounding variables adjusted in  
202 the aggregate total model. We calculated Arioan test using standardized coefficients of the  
203 indirect effects of adiposity on LTL through smoking, drinking, physical activity, and diet. A  
204 significant Arioan z test suggests a significant indirect effect of adiposity measure and LTL via a  
205 candidate mediator. [38] We calculated the proportion of each of the mediators associated with

206 the individual adiposity measure and LTL.[39] We also fitted all 4 mediators as covariates in the  
207 final regression model. The mathematical equation formula for Arioan z test is:

$$208 \quad Z_{mediation} = \frac{Z_a Z_b}{\hat{\sigma}_{z_{ab}}} = \frac{\frac{a}{s_a} \times \frac{b}{s_b}}{\sqrt{Z_a^2 + Z_b^2 + 1}}$$

209 All analyses were conducted using SAS version 9.3.[40] A two-tailed level of  
210 significance was established as  $P \leq .05$ .

## 211 **Results**

212 Descriptive results in Table 1 reveal African Americans have longer mean LTL (1.13  
213 T/S) compared to the total sample, Mexican Americans, and Whites (1.06, 1.04, 1.05 T/S,  
214 respectively). The average mean age for the total sample and Whites was somewhat similar (46  
215 versus 47 years) with younger age observed in African Americans and Mexican Americans (42  
216 versus 38 years). The distribution of women and men was also comparable in the total sample  
217 and among Whites (51% versus 49%). African Americans had a higher proportion of women; a  
218 lower proportion was in Mexican Americans (53% versus 46%). The prevalence that lived  
219 below poverty was lower in the aggregate sample and among Whites (18% and 14%) and a  
220 higher prevalence was among African Americans and Mexican Americans (32% and 31%).  
221 Mean body mass index and mean waist circumference was slightly higher among African  
222 Americans (29kg/m<sup>2</sup> and 96cm) compared to the other groups; mean % total body fat was similar  
223 across all groups. A lower prevalence of African Americans and Mexican Americans smoked 30-  
224  $\geq 59$  pack years of cigarettes (3.3% and 1.9%); prevalence of non-smokers was also higher in  
225 these groups (61% and 62%). The prevalence of all groups smoking <30 pack years of cigarettes  
226 was somewhat similar. A lower prevalence of African Americans were heavy drinkers (18%)  
227 compared to a higher prevalence among Mexican Americans (33%). The prevalence of moderate  
228 drinking was higher in the total sample and among Whites (50% and 53%). The prevalence of

229 abstainers was higher among African Americans (44%). A higher prevalence of African  
 230 Americans and Mexican Americans were below the recommended level of physical activity per  
 231 week (56% and 53%). The aggregate sample and Whites had a higher prevalence that  
 232 met/exceeded the recommended guidelines (61% and 65%). The mean HEI score was somewhat  
 233 comparable across groups, except slightly lower in African Americans. However, the prevalence  
 234 of hypertension was higher among African Americans and lower among Mexican Americans  
 235 (33% versus 15%) but comparable in the total sample and in Whites (25%). Mexican Americans  
 236 as well as African Americans had a higher prevalence of type 2 diabetes (7% and 8%) compared  
 237 to a comparable lower prevalence in Whites and the total sample (5%). Mean CRP and GGT  
 238 was higher among African Americans (0.51mg/dL and 42U/L). White blood cell count was  
 239 lower in African Americans and higher in Mexican Americans compared to the other groups  
 240 (6.4 $\mu$ L versus 7.30 $\mu$ L). The % of lymphocytes, monocytes, and basophils was higher in African  
 241 Americans (35%, 8.5%, .68%, respectively). However, percentages of neutrophils and  
 242 eosinophils were higher among Whites and the total sample (59.3% and 2.7%).

243 **Table 1:** Total and race/ethnic specific weighted characteristics of study variables, NHANES<sup>a</sup> 1999-2002 (N=4919)  
 244

|                                       | Total<br>(N=4919) |                       | African American<br>(N=919) |                       | Mexican American<br>(N=1262) |                       | White<br>(N=2738) |                       | P-value |
|---------------------------------------|-------------------|-----------------------|-----------------------------|-----------------------|------------------------------|-----------------------|-------------------|-----------------------|---------|
|                                       | %                 | Mean(SD) <sup>b</sup> | %                           | Mean(SD) <sup>b</sup> | %                            | Mean(SD) <sup>b</sup> | %                 | Mean(SD) <sup>b</sup> |         |
| Leukocyte telomere length (T/S Ratio) |                   | 1.06(.01)             |                             | 1.13(.02)             |                              | 1.04(.02)             |                   | 1.05(.02)             | <.0001  |
| Age, years (20-<85)                   |                   | 46.0(.42)             |                             | 42.4(.48)             |                              | 38.3(.56)             |                   | 47.1(.46)             | <.0001  |
| Gender                                |                   |                       |                             |                       |                              |                       |                   |                       | .003    |
| Women                                 | 50.8              |                       | 53.6                        |                       | 45.8                         |                       | 50.9              |                       |         |
| Men                                   | 49.2              |                       | 46.4                        |                       | 54.2                         |                       | 49.1              |                       |         |
| Poverty income ratio                  |                   |                       |                             |                       |                              |                       |                   |                       | <.0001  |
| Below poverty                         | 17.6              |                       | 32.6                        |                       | 31.3                         |                       | 14.6              |                       |         |

|                                                 |            |            |            |            |        |
|-------------------------------------------------|------------|------------|------------|------------|--------|
| Meet and above poverty                          | 82.4       | 67.4       | 68.7       | 85.4       |        |
| Body mass index (kg/m <sup>2</sup> )            | 27.9(.16)  | 29.5(.31)  | 28.2(.24)  | 27.6(.18)  | <.0001 |
| % Total body fat                                | 33.7(.19)  | 33.1(.39)  | 33.6(.38)  | 33.8(.23)  | <.0001 |
| Waist circumference (cm)                        | 95.6(.38)  | 96.2(.62)  | 94.7(.54)  | 95.6(.45)  | <.0001 |
| Pack years smoked                               |            |            |            |            | <.0001 |
| 30->=59                                         | 8.7        | 3.2        | 1.8        | 9.8        |        |
| <30                                             | 36.8       | 35.4       | 36.2       | 37.2       |        |
| 0                                               | 54.5       | 61.2       | 62.0       | 53.0       |        |
| Drinking level per day                          |            |            |            |            | <.0001 |
| Heavy                                           | 20.9       | 17.6       | 33.3       | 20.2       |        |
| Moderate                                        | 50.1       | 38.6       | 32.7       | 53.2       |        |
| Abstainer                                       | 29.0       | 43.8       | 34.0       | 26.6       |        |
| Physical activity recommendation level per week |            |            |            |            | <.0001 |
| Below                                           | 38.5       | 56.4       | 53.4       | 35.0       |        |
| Meet / Exceed                                   | 61.4       | 43.5       | 46.6       | 64.0       |        |
| Healthy Eating Index Score (2005)               | 50.7 (.46) | 48.2(.67)  | 51.5 (.45) | 51.0 (.55) | <.0001 |
| Hypertension                                    | 25.1       | 33.3       | 15.1       | 25.0       | <.0001 |
| Type 2 Diabetes                                 | 5.3        | 8.4        | 6.9        | 4.8        | <.0001 |
| CRP <sup>c</sup> (mg/dL)                        | .39(.01)   | .51(0.04)  | .43(.04)   | .38(.01)   | <.0001 |
| GGT <sup>d</sup> (U/L)                          | 30.7 (.70) | 41.8 (2.7) | 34.8 (1.2) | 29.0 (.74) | <.0001 |
| White blood cell count (SI)                     | 7.1 (.06)  | 6.4 (.06)  | 7.3 (.06)  | 7.1 (.06)  | <.0001 |
| Lymphocyte (%)                                  | 29.8 (.21) | 35.3 (.24) | 30.5 (.21) | 29.1 (.23) | <.0001 |
| Monocyte (%)                                    | 8.1 (.04)  | 8.4 (.10)  | 7.7 (.10)  | 8.1 (.04)  | <.0001 |
| Neutrophils (%)                                 | 58.6 (.22) | 52.8 (.29) | 58.4 (.32) | 59.3 (.24) | <.0001 |

|                 |           |           |           |           |        |
|-----------------|-----------|-----------|-----------|-----------|--------|
| Eosinophils (%) | 2.7 (.02) | 2.7 (.06) | 2.6 (.10) | 2.7 (.03) | <.0001 |
| Basophils (%)   | .66(.02)  | .68(.01)  | .61(.01)  | .66(.02)  | <.0001 |

245 <sup>a</sup>NHANES, National Health and Nutrition Examination Survey

246

247 <sup>b</sup>SD, standard deviation

248

249 <sup>c</sup>CRP, C-reactive protein

250

251 <sup>d</sup>GGT, gamma glutamyltransferase

252

### 253 Adiposity and LTL according to each race/ethnic group

254 The results for the adjusted association comparing adiposity measures and LTL  
 255 differences according to each race/ethnic group are presented in Table 2. Findings reveal LTL  
 256 significantly decreased 28% and 11% for each unit increase in BMI and waist circumference in  
 257 African Americans, respectively. LTL significantly decreased 33% in Mexican Americans due to  
 258 increasing % total body fat. Whites experienced a significant 19%, 23%, and .08% decrease in  
 259 LTL associated with increasing BMI, % total body fat, and waist circumference, respectively.  
 260 There was no significant association between LTL and % total body fat in African Americans or  
 261 BMI and waist circumference in Mexican Americans.

262 **Table 2:** Adjusted ordinary least squares regression of log-transformed LTL<sup>a</sup> (T/S ratio) on adiposity stratified by  
 263 individual race/ethnic group, NHANES<sup>b</sup>1999-2002

264

| Adiposity           | African American <sup>c</sup> |                 | Mexican American <sup>c</sup> |                 | White <sup>c</sup>         |                 |
|---------------------|-------------------------------|-----------------|-------------------------------|-----------------|----------------------------|-----------------|
|                     | $\beta$<br>(95% CI)           | <i>P</i> -value | $\beta$<br>(95% CI)           | <i>P</i> -value | $\beta$<br>(95% CI)        | <i>P</i> -value |
| BMI                 | -.0028<br>(-.0053, -.0004)    | .02             | -.0012<br>(-.0044,.0019)      | .43             | -.0019<br>(-.0037,.000003) | .05             |
| % total body fat    | -.0023<br>(-.0049, 0.0002)    | .07             | -.0033<br>(-.0066, -0.0001)   | .04             | -.0023<br>(-.0037, -.0008) | .003            |
| Waist circumference | -.0011<br>(-.0020, -.0001)    | .03             | -.0003<br>(-.0015,.0009)      | .59             | -.0008<br>(-.0016, -.0001) | .02             |

265 <sup>a</sup>LTL, Leukocyte telomere length

266  
267  
268  
269  
270  
271

<sup>b</sup>NHANES, National Health and Nutrition Examination Survey

<sup>c</sup>Adjusted for age, age<sup>2</sup>, sex, PIR, hypertension, type 2 diabetes, CRP, GGT, white blood cells, lymphocytes, monocytes, neutrophils, eosinophils, basophils.

272 **Adiposity and LTL by sex specific race/ethnicity**

273 Findings comparing differences in the association of LTL and adiposity measures  
274 according to sex specific race/ethnic groups are presented in Table 3. There was no association  
275 between any of the adiposity measures and LTL in African American and Mexican American  
276 men. Only White men experienced a 26% significant decrease in LTL associated with  
277 increasing BMI and increasing waist circumference was marginally associated with a 11%  
278 decrease in LTL. African American women experienced a significant 41%, 44%, and 16%  
279 decrease in LTL due increasing in BMI, % total body fat and waist circumference, respectively.  
280 Increasing % total body fat resulted in a significant 29% decrease in LTL in White women.  
281 There was no association with any of the adiposity measures in Mexican American women.

282 **Table 3:** Adjusted ordinary least squares regression of log-transformed LTL<sup>a</sup> (T/S ratio) on adiposity comparing  
283 race/ethnic group stratified by sex, NHANES<sup>b</sup> 1999-2002  
284

285 Men<sup>c</sup>

286

| Adiposity           | African American <sup>c</sup> |                 | Mexican American <sup>c</sup> |                 | White <sup>c</sup>         |                 |
|---------------------|-------------------------------|-----------------|-------------------------------|-----------------|----------------------------|-----------------|
|                     | $\beta$<br>(95% CI)           | <i>P</i> -value | $\beta$<br>(95% CI)           | <i>P</i> -value | $\beta$<br>(95% CI)        | <i>P</i> -value |
| BMI                 | -0.0016<br>(-.0060, .0028)    | .46             | -0.0025<br>(-.0079, .0029)    | .34             | -0.0026<br>(-.0053, .0001) | .05             |
| % total body fat    | -0.0012<br>(-.0055, .0032)    | .58             | -0.0041<br>(-.0092, .0011)    | .11             | -0.0018<br>(-.0042, .0005) | .12             |
| Waist circumference | -0.0008<br>(-.0025, .0010)    | .37             | -0.0009<br>(-.0029, .0011)    | .36             | -0.0011<br>(-.0022, .0001) | .06             |

287  
288

289  
290

Women<sup>c</sup>

| Adiposity           | African American <sup>c</sup> |                 | Mexican American <sup>c</sup> |                 | White <sup>c</sup>         |                 |
|---------------------|-------------------------------|-----------------|-------------------------------|-----------------|----------------------------|-----------------|
|                     | $\beta$<br>(95% CI)           | <i>P</i> -value | $\beta$<br>(95% CI)           | <i>P</i> -value | $\beta$<br>(95% CI)        | <i>P</i> -value |
| BMI                 | -.0041<br>(-.0070, -.0012)    | .007            | -.0003<br>(-.0037,.0031)      | .85             | -.0017<br>(-.0039,.0005)   | .12             |
| % total body fat    | -.0044<br>(-.0081, -.0007)    | .02             | -.0028<br>(-.0069,.0012)      | .16             | -.0029<br>(-.0048, -.0009) | .006            |
| Waist circumference | -.0016<br>(-.0031, -.0001)    | .04             | .0003<br>(-.0015,.0020)       | .77             | -.0007<br>(-.0017, .0004)  | .19             |

291 <sup>a</sup>LTL, leukocyte telomere length

292

293 <sup>b</sup>NHANES, National Health and Nutrition Examination Survey

294

295 <sup>c</sup>Adjusted for age, age<sup>2</sup>, PIR, hypertension, type 2 diabetes, CRP, GGT, white blood cells, lymphocytes, monocytes,  
296 neutrophils, eosinophils, basophils.

297

## 298 **Moderating and mediator effects**

299 The moderating effect of race/ethnicity and sex was not associated with adiposity  
300 measures and LTL as evidenced by non-significant *z* scores. The *z* score for BMI is  $z_{\text{African}}$   
301  $z_{\text{American vs White}} = .03, P = .97, z_{\text{African American vs Mexican Americans}} = -.33, P = .74, z_{\text{White vs Mexican American}} = -$   
302  $.37, P = .70$ . The *z* score for % total body fat is  $z_{\text{African American vs White}} = .97, P = .32, z_{\text{African American vs}}$   
303  $z_{\text{Mexican Americans}} = 1.02, P = .30, z_{\text{White vs Mexican American}} = .20, P = .83$ . The *z* score for waist  
304 circumference is  $z_{\text{African American vs White}} = .22, P = .82, z_{\text{African American vs Mexican Americans}} = -.39, P = .69,$   
305  $z_{\text{White vs Mexican American}} = -.64, P = .52$ . For sex the *z* score for BMI is  $z_{\text{men vs women}} = -.51, P = .60$ , for  
306 % total body fat  $z_{\text{men vs women}} = .14, P = .88$ , and for waist circumference  $z_{\text{men vs women}} = -.49, P =$   
307  $.61$ . There was also no significant interaction for race/ethnicity and sex in the aggregate model  
308 (data not presented). Therefore, the test of mediation for health behaviors associated with LTL  
309 and adiposity measures was performed on the full sample due to the lack of moderating effects.  
310 Table 4 presents the combined results associated with separate linear regression analysis without

311 adjustment for mediators, with adjustment for mediators, and separate test of mediation for each  
 312 health behavior contributing to the relationship between adiposity measure and LTL. Results  
 313 revealed BMI and waist circumference were associated with relatively similar significant  
 314 relationships with decreased LTL after adjustment for mediators as indicated by the *p* values in  
 315 model 1 and model 2. However, the association between LTL and % total body fat disappeared  
 316 after adjustment for mediators (*p* = .07).

317 **Table 4:** Adjusted ordinary least squares regression of log-transformed LTL (T/S ratio) on adiposity for the total  
 318 sample without mediators, with mediator effects and the effect of mediators between adiposity and LTL, NHANES  
 319 1999-2002  
 320

| Adiposity                     | Model 1 <sup>a</sup>       |                 | Model 2 <sup>b</sup>       |                 |                 |                               |                 |
|-------------------------------|----------------------------|-----------------|----------------------------|-----------------|-----------------|-------------------------------|-----------------|
|                               | $\beta$<br>(95% CI)        | <i>P</i> -value | $\beta$<br>(95% CI)        | <i>P</i> -value |                 |                               |                 |
| BMI                           | -.0018<br>(-.0032, -.0004) | .01             | -.0015<br>(-.0030, -.0002) | .02             |                 |                               |                 |
| % Total Body Fat              | -.0022<br>(-.0034, -.0010) | .001            | -.0019<br>(-.0033, -.0005) | .07             |                 |                               |                 |
| Waist Circumference           | -.0007<br>(-.0013, -.0002) | .007            | -.0006<br>(-.0011, -.0001) | .02             |                 |                               |                 |
| Adiposity/Mediator            |                            |                 | $\beta$<br>(95% CI)        | <i>P</i> -value | MP <sup>c</sup> | <i>Z</i> <sub>mediation</sub> | <i>P</i> -value |
| <b>BMI</b>                    |                            |                 |                            |                 |                 |                               |                 |
| <b>Pack Years Smoked</b>      |                            |                 |                            |                 |                 |                               |                 |
| 30->=59                       | *                          | *               | -.0379<br>(-.0734, -.0023) | .03             | .04             | -.45                          | .65             |
| <30                           | *                          | *               | .0065<br>(-.0123, .0255)   | .48             | .01             | .11                           | .90             |
| 0                             | *                          | *               | Reference                  | *               | *               | *                             | *               |
| <b>Drinking Level per Day</b> |                            |                 |                            |                 |                 |                               |                 |
| Heavy                         | *                          | *               | .0232<br>(-.0110, .0573)   | .17             | .09             | -1.05                         | .29             |

|                                  |   |   |                            |      |     |       |     |
|----------------------------------|---|---|----------------------------|------|-----|-------|-----|
| Moderate                         | * | * | .0098<br>(-.0148, .0344)   | .42  | .13 | -.94  | .34 |
| Abstainer                        | * | * | Reference                  | *    | *   | *     | *   |
| Physical Activity Level per Week |   |   |                            |      |     |       |     |
| Below                            | * | * | -.0128<br>(-.0259, .0004)  | .05  | .35 | -1.93 | .05 |
| Meet / Exceed                    | * | * | Reference                  | *    | *   | *     | *   |
| Healthy Eating Index             | * | * | .0011<br>(.0004, .0018)    | .003 | .28 | -1.84 | .06 |
| % Total Body Fat                 |   |   |                            |      |     |       |     |
| Pack Years Smoked                |   |   |                            |      |     |       |     |
| 30->=59                          | * | * | -.0386<br>(-.0742, -.0030) | .03  | .21 | 2.10  | .03 |
| <30                              | * | * | .0055<br>(-.0138, .0248)   | .56  | .02 | .26   | .79 |
| 0                                | * | * | Reference                  | *    | *   | *     | *   |
| Drinking Level per Day           |   |   |                            |      |     |       |     |
| Heavy                            | * | * | .0227<br>(-.0114, .0568)   | .18  | .08 | -1.17 | .24 |
| Moderate                         | * | * | .0099<br>(-.0144, .0343)   | .41  | .07 | -.93  | .35 |
| Abstainer                        | * | * | Reference                  | *    | *   | *     | *   |
| Physical Activity Level per Week |   |   |                            |      |     |       |     |
| Below                            | * | * | -.0115<br>(-.0247, .0016)  | .08  | .29 | -1.87 | .06 |
| Meet / Exceed                    | * | * | Reference                  | *    | *   | *     | *   |
| Healthy Eating Index             | * | * | .0011<br>(.0004, .0018)    | .004 | .25 | -2.33 | .01 |
| Waist Circumference              |   |   |                            |      |     |       |     |
| Pack Years Smoked                |   |   |                            |      |     |       |     |
| 30->=59                          | * | * | -.0367<br>(-.0724, -.0011) | .04  | .15 | -1.55 | .11 |

|                                  |   |   |                           |      |      |       |     |
|----------------------------------|---|---|---------------------------|------|------|-------|-----|
| <30                              | * | * | .0068<br>(-.0121, .0257)  | .46  | .004 | .08   | .94 |
| 0                                | * | * | Reference                 | *    | *    | *     | *   |
| Drinking Level per Day           |   |   |                           |      |      |       |     |
| Heavy                            | * | * | .0236<br>(-.0101, .0573)  | .16  | .06  | -.91  | .36 |
| Moderate                         | * | * | .0101<br>(-.0141, .0343)  | .40  | .09  | -.95  | .34 |
| Abstainer                        | * | * | Reference                 | *    | *    | *     | *   |
| Physical Activity Level per Week |   |   |                           |      |      |       |     |
| Below                            | * | * | -.0126<br>(-.0258, .0007) | .06  | .32  | -1.95 | .05 |
| Meet / Exceed                    | * | * | Reference                 | *    | *    | *     | *   |
| Healthy Eating Index             | * | * | .0011<br>(.0004, .0018)   | .003 | .28  | -2.14 | .03 |

321

322 <sup>a</sup>Adjusted for race, age, age<sup>2</sup>, sex, PIR, Hypertension, Type 2 diabetes, CRP, GGT, white blood cells, Lymphocytes,  
323 monocytes, neutrophils, eosinophils, basophils.

324

325 <sup>b</sup>Additionally adjusted for mediators - pack years smoked, drinking level per day, physical activity level per week,  
326 diet based on Healthy Eating Index.

327

328 <sup>c</sup>MP, mediated proportion.

329

330 Findings regarding the mediation effects of adverse health behaviors reveal that 30=>59

331 pack years smoked was associated with about a 4% decrease in LTL for each unit increase in

332 BMI ( $p = .03$ ); however, it was not a significant mediator ( $z_{30 \rightarrow 59 \text{ pack years}} = -.45, p = .65$ ). Alcohol

333 consumption per day was also not a significant mediator between LTL and BMI. On the other

334 hand, physical activity below the recommended guidelines was associated with a 1.28% decrease

335 in LTL and BMI ( $p = .05$ ) and accounted for 35% of the relationship ( $z_{\text{physical activity}} = -1.92, p$

336  $= .05$ ). Diet as measured by HEI was associated with a 11% increase in LTL for each unit

337 increase in BMI ( $p=.003$ ); however, it was marginally associated with the correlation ( $z_{HEI} = -$   
338  $1.83, p = .06$ ).

339 Smoking 30=>59 pack years was associated with a 4% decrease in LTL and increasing  
340 % total body fat ( $p=.03$ ) and was a significant mediator contributing 21% of the association ( $z_{30-}$   
341  $=>59 \text{ pack years} = -2.52, p = .03$ ). Physical activity below recommended guideline was marginally  
342 correlated with 1.15% decrease in LTL for each unit increase in % total body fat ( $p=.08$ ) and was  
343 a marginal mediating factor ( $z_{\text{physical activity}} = -1.86, p = .06$ ). Diet based HEI resulted in a 11%  
344 increase in LTL due to increasing % total body fat ( $p=.004$ ) and was responsible for 25% of the  
345 relationship ( $z_{HEI} = -2.32, p = .01$ ).

346 30=>59 pack years smoked was associated with a 4% decrease in LTL for each unit  
347 increase in waist circumference ( $p = .04$ ); however, it was not a significant mechanism between  
348 the association ( $z_{30=>59 \text{ pack years}} = -1.55, p=.11$ ) Physical activity below the recommended  
349 guidelines resulted in a 1.26% marginal decrease in LTL and waist circumference ( $p=.06$ ) but  
350 was a mediating effect responsible for 32% of the relationship ( $z_{\text{physical activity}} = -1.95, p = .05$ ). Diet  
351 measured by HEI was associated with a 11% increase in LTL and waist circumference ( $p=.003$ )  
352 and significantly contributed 28% to the mechanism between the association ( $z_{HEI} = -2.14, p =$   
353  $.03$ ).

## 354 **Discussion**

355 The objective of our study was to assess the association between adiposity measures and  
356 LTL in a representative US sample population comprised of major racial/ethnic groups and  
357 demonstrate mediation effects based on adverse health behaviors. As a group, African Americans  
358 experienced shorter telomere length associated with BMI and waist circumference. Whites, on  
359 the other hand, experienced shorter telomere length for each of the measures. Only % total body

360 fat correlated with shorter telomere length in Mexican Americans. This finding may reflect how  
361 adiposity is concentrated in Mexican Americans. We observed a steeper decline in telomere  
362 length associated with BMI in African Americans compared to Whites. It has been demonstrated  
363 that regional and whole-body adiposity, including skeletal muscle and bone, differ by  
364 race/ethnicity and may not adequately reflect adiposity measures when comparing one  
365 race/ethnic group to another.[41] Our stratified findings may support this theory.

366         When analyzed separately by sex, we found no association with any of the adiposity  
367 measures and telomere length in African American or Mexican American men. African  
368 American and Mexican American men tend to be leaner compared to African American and  
369 Hispanic American women. [42] Only BMI was associated with shorter telomere length in  
370 White men. The fact that only one adiposity measure was correlated with shorter telomere  
371 length is consistent with this group having a lower overall prevalence of obesity.[42]

372         We observed opposite findings for women. For instance, African American women  
373 experienced shorter telomere length related to increases in each of the adiposity measures. This  
374 finding is not surprising given African American women have the highest prevalence of obesity  
375 compared to men and women in other racial/ethnic groups.[42] One theory suggests African  
376 American women are a unique group susceptible to obesity due to mechanisms associated with  
377 dietary preferences and early childbearing.[43] It may also be due to differences in metabolism  
378 and perceptions about an ideal body.[44] As with Mexican American men, we found no  
379 correlation in Mexican American women associated with any of the exposure measures and  
380 telomere length. We were surprised to find the lack of association in Mexican American women  
381 given the high prevalence of obesity in Hispanic women.[42, 45] National prevalence rates are  
382 generally based on aggregate data of Hispanics in general and does not consider ethnic

383 differences within Hispanics. Our findings on Mexican American women may reflect such  
384 heterogeneity and may not be indicative of obesity status in Mexican American women. Only %  
385 total body fat was correlated with shorter telomere length in White women. This is not a unique  
386 finding given White women have an overall lower prevalence of obesity. [42] The difference in  
387 the association by sex that we observed may be due to several factors – including environmental  
388 and hormonal.[11, 19]

389 Our findings regarding adverse health behaviors as mediators revealed physical activity  
390 per week below the recommended guideline was a mechanism associated with the relationship  
391 between BMI and shorter telomere length. 30-=>59 pack years smoked was a pathway between  
392 % total body fat and shorter telomere length while an improvement in diet was associated with  
393 an increase in telomere length and % total body fat. Inadequate weekly physical activity was  
394 also a causal pathway between waist circumference and shorter telomere. An improvement in  
395 diet was a mechanism between longer telomere length and waist circumference. Level of  
396 drinking per day was not a mediator between any of the adiposity indices and telomere length.

397 There are conflicting findings regarding the relationship between adiposity and telomere  
398 length in the literature.[26] Lee and colleagues, for instance, studied 345 White individuals in the  
399 greater Dayton, Ohio and demonstrated individuals with higher total and abdominal adiposity  
400 have shorter telomere length.[12] Findings from two studies using national NHANES data  
401 similarly revealed an increase in BMI, waist circumference and % total body fat was associated  
402 with a decrease in LTL in the aggregate sample which reflect our findings.[14, 15] An  
403 investigation of the Cardiovascular Health Study, on the other hand, found no association  
404 between telomere length and BMI and waist circumference.[16] A study by Maceneay et al of  
405 67 middle-aged and older adults also revealed no correlation between normal and

406 overweight/obese BMI parameters with telomere length.[18] A study of 322 postmenopausal  
407 women residing in Seattle, Washington revealed no association with BMI and % body fat.[19]

408 Few studies have compared the association between adiposity and telomere length  
409 according to race/ethnicity and concomitant sex. We could find only one study of 317 White and  
410 African American adults residing in South Carolina.[17] The investigators found no relationship  
411 between BMI and visceral fat in Whites, African Americans or by sex.

412 Other studies with a racial/ethnic homogenous sample population also produced mixed  
413 results. A Swedish study show selective adiposity measures were associated with a decrease in  
414 telomere length only in women.[46] An investigation in Denmark revealed an inverse association  
415 between BMI and telomere length.[47] A recent study found obesity was related to shorter  
416 telomere length in Latina women.[48] However, a study sample of Koreans showed waist  
417 circumference was negatively associated with telomere length.[49] These conflicting findings  
418 between adiposity and cellular aging as measured by telomere length may be due to several  
419 factors -including study design, participant characteristics, a small study sample and other  
420 limitations.

421 Obesity is a major risk factor for chronic morbidities and is due, in large part, to adverse  
422 modifiable lifestyle factors.[5] The predominant mechanism through which obesity may shorten  
423 telomere length and increase risk of aging-related diseases include increased oxidative stress,  
424 which increase telomere erosion, inflammation and accelerates leukocyte turnover.[9-11] A non-  
425 biological mechanism contributing to telomere attrition may also include adverse behaviors  
426 factors.[26] Several studies have established a parallel relationship between adverse lifestyle  
427 factors and telomere length. Patel et al, for instance, found lack of physical activity resulted in  
428 shorter telomere length among US adults.[24] A national sample of US women likewise found

429 smoking, unhealthy diet and lower physical activity was correlated with telomere attrition.[25]  
430 Other investigations fail to establish a correlation.[19, 21, 22] None have assessed the  
431 relationship associated with adverse lifestyle between obesity and telomere length. Our  
432 investigation was designed to examine health behaviors as mediators between adiposity and  
433 telomere length. Findings demonstrate selective lifestyle behavior factors as a potential causal  
434 pathway. Such a relationship suggest improvements in lifestyle may reduce biological aging and  
435 prevent telomere cell senescence due to obesity.

### 436 **Limitations**

437       There are some caveats to our study that require consideration. First, we do not know the  
438 direction of the relationship between adiposity and LTL. Some researchers argue that selective  
439 adoption may be a causal factor related to telomere length.[50] Selective adoption could occur  
440 either because telomere length directly affects behavior or because behavior affects telomere  
441 length, or both are affected by a third variable – such as exposure to early-life adversity. In  
442 addition, telomere senescence occurs overtime and may present in some cases with a U-shaped  
443 pattern.[51] The NHANES is a cross-sectional survey and changes in LTL may come before  
444 exposure. Therefore, the correlations we observed should not be interpreted as causal. One way  
445 to address these important issues is to design longitudinal analysis to measure the bi-directional  
446 effect of differences in LTL and adiposity overtime before obesity event. Second, although we  
447 adjusted for potential confounders – other unmeasured confounding factors may exist resulting in  
448 “omitted variable bias” such as heritability, ancestry, menopausal status, adiposity biomarkers  
449 (i.e. leptin and adiponectin) and sex-hormones that may affect our findings. Third, we measured  
450 telomere length only in leukocytes. Whether our findings can be extrapolated to other tissues is  
451 unclear. However, studies have demonstrated robust correlations between LTL and telomere

452 length in other tissues.[52, 53] Fourth, our mediation measures are subject to measurement error  
453 even though they have been validated and proven to be accurate in other studies.[54-56]

454 Despite, these limitations, our study has many strengths. It is comprised of a  
455 representative major racial/ethnic sample of US adults from which findings can be extrapolated.  
456 It is among the largest and first study to investigate the association of adiposity and telomere  
457 length according to race/ethnicity and sex specific race/ethnicity. Finally, we investigated the  
458 causal pathway between adiposity and telomere length based on potential modifiable lifestyle  
459 behavioral factors. Our detailed measurements of lifestyle and dietary factors enabled us to make  
460 categories that were consistent with current guideline on lifestyle and diet which can  
461 subsequently be translated into public health intervention messages.

## 462 **Conclusion**

463 Telomere length is a measure of biological and cellular aging.[11] Obesity is increasing  
464 at an epidemic rate and is associated with several age-related health conditions.[5, 57] Several  
465 studies have investigated the relationship between adiposity and telomere length.[12-19] Ours is  
466 the first to assess such a relationship in a US representative sample according to race/ethnicity  
467 and corresponding sex. Our findings reveal that African Americans and Whites have a worse  
468 overall profile regarding the association between collective adiposity measures and telomere  
469 length. White men experienced decreased telomere length due to increasing BMI and there was  
470 no relationship observed in African American and Mexican American men. White women only  
471 experienced shorter telomere length due to increasing % total body fat. African American  
472 women experienced shorter telomere length associated with increases in each of the adiposity  
473 measures and have a more deleterious health profile based on sex. Our findings also reveal  
474 selective adverse lifestyle factors as a mechanism underlying the relationship between adiposity

475 and LTL which portend modifying such factors may result in improvements in cellular and  
476 biological aging due to obesity among US adults.

#### 477 **Author Contributions**

478 **Conceptualization, design, acquisition of data:** Sharon K. Davis

479 **Statistical analysis:** Ruihua Xu and Sharon K. Davis

480 **Interpretation of data:** Sharon K. Davis, Ruihua Xu, Rumana J. Khan, Amadou Gaye, Yie Liu

481 **Writing first draft:** Sharon K. Davis

482 **Writing, review and editing:** Sharon K. Davis, Ruihua Xu, Rumana J. Khan, Amadou Gaye,  
483 Yie Liu

484 All authors approved the final version of the manuscript to be published and all agree to be  
485 accountable for all aspects of the work in ensuring that questions related to the accuracy or  
486 integrity of any part of the work are appropriately investigated and resolved.

#### 487 **References**

- 488 1. Sun X, Du T: Trends in cardiovascular risk factors among U.S. men and women with and without  
489 diabetes, 1988–2014. *BMC Public Health* 2017, 17(1):893.
- 490 2. Ng M, Fleming T, Robinson M, Thomson B, Graetz N, Margono C, Mullany EC, Biryukov S,  
491 Abbafati C, Abera SF et al: Global, regional and national prevalence of overweight and obesity in  
492 children and adults 1980-2013: A systematic analysis. *Lancet (London, England)* 2014,  
493 384(9945):766-781.
- 494 3. Available from: <http://www.who.int/newd-room/fact-sheets/detail/obesity-and-overweight>.
- 495 4. Ogden CL, Carroll MD, Kit BK, KM F. Prevalence of obesity among adults: United States, 2011-  
496 2012. NCHS data brief, no 131 Hyattsville, MD, National Center for Health Statistics 2013.
- 497 5. Poirier P, Giles TD, Bray GA, Hong Y, Stern JS, Pi-Sunyer FX, Eckel RH: Obesity and cardiovascular  
498 disease: pathophysiology, evaluation, and effect of weight loss: an update of the 1997 American  
499 Heart Association Scientific Statement on Obesity and Heart Disease from the Obesity  
500 Committee of the Council on Nutrition, Physical Activity, and Metabolism. *Circulation* 2006,  
501 113(6):898-918.
- 502 6. Hammadah M, Al Mheid I, Wilmot K, Ramadan R, Abdelhadi N, Alkhoder A, Obideen M, Pimple  
503 PM, Levantsevych O, Kelli HM et al: Telomere Shortening, Regenerative Capacity, and  
504 Cardiovascular Outcomes. *Circulation research* 2017, 120(7):1130-1138.
- 505 7. Fyhrquist F, Saijonmaa O, Strandberg T: The roles of senescence and telomere shortening in  
506 cardiovascular disease. *Nature reviews Cardiology* 2013, 10(5):274-283.

- 507 8. Haycock PC, Heydon EE, Kaptoge S, Butterworth AS, Thompson A, Willeit P: Leucocyte telomere  
508 length and risk of cardiovascular disease: systematic review and meta-analysis. *BMJ (Clinical*  
509 *research ed)* 2014, 349:g4227.
- 510 9. Suzuki K, Ito Y, Ochiai J, Kusuhara Y, Hashimoto S, Tokudome S, Kojima M, Wakai K, Toyoshima  
511 H, Tamakoshi K et al: Relationship between obesity and serum markers of oxidative stress and  
512 inflammation in Japanese. *Asian Pacific journal of cancer prevention : APJCP* 2003, 4(3):259-266.
- 513 10. Wolkowitz OM, Mellon SH, Epel ES, Lin J, Dhabhar FS, Su Y, Reus VI, Rosser R, Burke HM,  
514 Kupferman E et al: Leukocyte telomere length in major depression: correlations with chronicity,  
515 inflammation and oxidative stress--preliminary findings. *PloS one* 2011, 6(3):e17837.
- 516 11. Aviv A: Telomeres and human aging: facts and fibs. *Science of aging knowledge environment :*  
517 *SAGE KE* 2004, 2004(51):pe43.
- 518 12. Lee M, Martin H, Firpo MA, Demerath EW: Inverse association between adiposity and telomere  
519 length: The Fels Longitudinal Study. *American journal of human biology : the official journal of*  
520 *the Human Biology Council* 2011, 23(1):100-106.
- 521 13. Njajou OT, Cawthon RM, Blackburn EH, Harris TB, Li R, Sanders JL, Newman AB, Nalls M,  
522 Cummings SR, Hsueh WC: Shorter telomeres are associated with obesity and weight gain in the  
523 elderly. *International journal of obesity (2005)* 2012, 36(9):1176-1179.
- 524 14. Rehkopf DH, Needham BL, Lin J, Blackburn EH, Zota AR, Wojcicki JM, Epel ES: Leukocyte  
525 Telomere Length in Relation to 17 Biomarkers of Cardiovascular Disease Risk: A Cross-Sectional  
526 Study of US Adults. *PLoS Medicine* 2016, 13(11):e1002188.
- 527 15. Batsis JA, Mackenzie TA, Vasquez E, Germain CM, Emeny RT, Rippberger P, Lopez-Jimenez F,  
528 Bartels SJ: Association of adiposity, telomere length and mortality: data from the NHANES 1999-  
529 2002. *International journal of obesity (2005)* 2018, 42(2):198-204.
- 530 16. Fitzpatrick AL, Kronmal RA, Gardner JP, Psaty BM, Jenny NS, Tracy RP, Walston J, Kimura M, Aviv  
531 A: Leukocyte telomere length and cardiovascular disease in the cardiovascular health study.  
532 *American journal of epidemiology* 2007, 165(1):14-21.
- 533 17. Diaz VA, Mainous AG, Player MS, Everett CJ: Telomere length and adiposity in a racially diverse  
534 sample. *International journal of obesity (2005)* 2010, 34(2):261-265.
- 535 18. MacEneaney OJ, Kushner EJ, Westby CM, Cech JN, Greiner JJ, Stauffer BL, DeSouza CA:  
536 Endothelial progenitor cell function, apoptosis, and telomere length in overweight/obese  
537 humans. *Obesity (Silver Spring)* 2010, 18(9):1677-1682.
- 538 19. Mason C, Risques R-A, Xiao L, Duggan CR, Imayama I, Campbell KL, Kong A, Foster-Schubert KE,  
539 Wang CY, Alfano CM et al: Independent and Combined Effects of Dietary Weight Loss and  
540 Exercise on Leukocyte Telomere Length in Postmenopausal Women. *Obesity (Silver Spring, Md)*  
541 2013, 21(12):E549-E554.
- 542 20. Mundstock E, Sarria EE, Zatti H, Mattos Louzada F, Kich Grun L, Herbert Jones M, Guma FT,  
543 Mazzola In Memoriam J, Epifanio M, Stein RT et al: Effect of obesity on telomere length:  
544 Systematic review and meta-analysis. *Obesity (Silver Spring)* 2015, 23(11):2165-2174.
- 545 21. Rode L, Bojesen SE, Weischer M, Nordestgaard BG: High tobacco consumption is causally  
546 associated with increased all-cause mortality in a general population sample of 55,568  
547 individuals, but not with short telomeres: a Mendelian randomization study. *International*  
548 *journal of epidemiology* 2014, 43(5):1473-1483.
- 549 22. Weischer M, Bojesen SE, Nordestgaard BG: Telomere shortening unrelated to smoking, body  
550 weight, physical activity, and alcohol intake: 4,576 general population individuals with repeat  
551 measurements 10 years apart. *PLoS genetics* 2014, 10(3):e1004191.
- 552 23. Zhang C, Lauderdale DS, Pierce BL: Sex-Specific and Time-Varying Associations Between  
553 Cigarette Smoking and Telomere Length Among Older Adults. *American journal of epidemiology*  
554 2016, 184(12):922-932.

- 555 24. Patel CJ, Manrai AK, Corona E, Kohane IS: Systematic correlation of environmental exposure and  
556 physiological and self-reported behaviour factors with leukocyte telomere length. *International*  
557 *journal of epidemiology* 2017, 46(1):44-56.
- 558 25. Sun Q, Shi L, Prescott J, Chiuve SE, Hu FB, De Vivo I, Stampfer MJ, Franks PW, Manson JE,  
559 Rexrode KM: Healthy lifestyle and leukocyte telomere length in U.S. women. *PloS one* 2012,  
560 7(5):e38374.
- 561 26. Mundstock E, Zatti H, Louzada FM, Oliveira SG, Guma FT, Paris MM, Rueda AB, Machado DG,  
562 Stein RT, Jones MH et al: Effects of physical activity in telomere length: Systematic review and  
563 meta-analysis. *Ageing research reviews* 2015, 22:72-80.
- 564 27. Ford ES, Zhao G, Tsai J, Li C: Low-risk lifestyle behaviors and all-cause mortality: findings from  
565 the National Health and Nutrition Examination Survey III Mortality Study. *American journal of*  
566 *public health* 2011, 101(10):1922-1929.
- 567 28. Aviv A, Valdes AM, Spector TD: Human telomere biology: pitfalls of moving from the laboratory  
568 to epidemiology. *International journal of epidemiology* 2006, 35(6):1424-1429.
- 569 29. Cawthon RM: Telomere measurement by quantitative PCR. *Nucleic acids research* 2002,  
570 30(10):e47.
- 571 30. Gunter EW LB, Koncikowski SM: Laboratory procedures used for the Third National Health and  
572 Nutrition Examination Survey (NHANES III), 1988-1994. In. Edited by US Department of Health  
573 and Human Services NCHS; 1996.
- 574 31. Mannino DM, Aguayo SM, Petty TL, Redd SC: Low lung function and incident lung cancer in the  
575 United States: data From the First National Health and Nutrition Examination Survey follow-up.  
576 *Archives of internal medicine* 2003, 163(12):1475-1480.
- 577 32. Physical Activity Guidelines for Americans [<https://health.gov/paguidelines/guidelines/>]
- 578 33. Guenther PM, Reedy J, Krebs-Smith SM: Development of the Healthy Eating Index-2005. *Journal*  
579 *of the American Dietetic Association* 2008, 108(11):1896-1901.
- 580 34. US Census Bureau, Population Division, Fertility & Family Statistics Branch. In. Edited by Bureau  
581 UC; 2004.
- 582 35. National Center for Health Statistics. Analytic and reporting guidelines: The National Health and  
583 Nutrition Examination Survey (NHANES). In. Hyattsville, MD: National Center for Health  
584 Statistics, Centers for Disease Control and Prevention; 2006.
- 585 36. Paternoster R BR, Mazerolle P, Piquero A: Using the correct statistical test for the quality of  
586 regression coefficients. *Criminology* 1998, 36:859-866.
- 587 37. Baron RM, Kenny DA: The moderator-mediator variable distinction in social psychological  
588 research: conceptual, strategic, and statistical considerations. *Journal of personality and social*  
589 *psychology* 1986, 51(6):1173-1182.
- 590 38. D I: Mediation analysis and categorical variables: The final frontier. *Journal of Consumer*  
591 *Psychology* 2012, 22:582-594.
- 592 39. Ditlevsen S, Keiding N, Christensen U, Damsgaard MT, Lynch J: Mediation proportion.  
593 *Epidemiology (Cambridge, Mass)* 2005, 16(4):592.
- 594 40. SAS 9.3. In. Edited by Inc SI. Cary, NC 2011.
- 595 41. Heymsfield SB, Peterson CM, Thomas DM, Heo M, Schuna JM, Jr.: Why are there race/ethnic  
596 differences in adult body mass index-adiposity relationships? A quantitative critical review.  
597 *Obesity reviews : an official journal of the International Association for the Study of Obesity*  
598 2016, 17(3):262-275.
- 599 42. National Center for Health Statistics. Health, United States, 2015: With Special Feature on Racial  
600 and Ethnic Health Disparities. In. Hyattsville, MD. ; 2016.
- 601 43. Seamans MJ, Robinson WR, Thorpe RJ, Jr., Cole SR, LaVeist TA: Exploring racial differences in the  
602 obesity gender gap. *Annals of epidemiology* 2015, 25(6):420-425.

- 603 44. Lee J, Sa J, Chaput JP, Seo DC, Samuel T: Racial/ethnic differences in body weight perception  
604 among U.S. college students. *Journal of American college health : J of ACH* 2018:1-9.
- 605 45. Patel SR, Blackwell T, Redline S, Ancoli-Israel S, Cauley JA, Hillier TA, Lewis CE, Orwoll ES,  
606 Stefanick ML, Taylor BC et al: The association between sleep duration and obesity in older  
607 adults. *International journal of obesity (2005)* 2008, 32(12):1825-1834.
- 608 46. Nordfjall K, Eliasson M, Stegmayr B, Melander O, Nilsson P, Roos G: Telomere length is  
609 associated with obesity parameters but with a gender difference. *Obesity (Silver Spring)* 2008,  
610 16(12):2682-2689.
- 611 47. Rode L, Nordestgaard BG, Weischer M, Bojesen SE: Increased body mass index, elevated C-  
612 reactive protein, and short telomere length. *The Journal of clinical endocrinology and*  
613 *metabolism* 2014, 99(9):E1671-1675.
- 614 48. Wojcicki JM, Elwan D, Lin J, Blackburn E, Epel E: Chronic Obesity and Incident Hypertension in  
615 Latina Women Are Associated with Accelerated Telomere Length Loss over a 1-Year Period.  
616 *Metabolic syndrome and related disorders* 2018.
- 617 49. Kim J-H, Kim HK, Ko J-H, Bang H, Lee D-C: The Relationship between Leukocyte Mitochondrial  
618 DNA Copy Number and Telomere Length in Community-Dwelling Elderly Women. *PloS one* 2013,  
619 8(6):e67227.
- 620 50. Bateson M, Nettle D: Why are there associations between telomere length and behaviour?  
621 *Philosophical transactions of the Royal Society of London Series B, Biological sciences* 2018,  
622 373(1741).
- 623 51. Raschenberger J, Kollerits B, Titze S, Kottgen A, Barthlein B, Ekici AB, Forer L, Schonherr S,  
624 Weissensteiner H, Haun M et al: Do telomeres have a higher plasticity than thought? Results  
625 from the German Chronic Kidney Disease (GCKD) study as a high-risk population. *Experimental*  
626 *gerontology* 2015, 72:162-166.
- 627 52. Okuda K, Bardeguet A, Gardner JP, Rodriguez P, Ganesh V, Kimura M, Skurnick J, Awad G, Aviv A:  
628 Telomere length in the newborn. *Pediatric research* 2002, 52(3):377-381.
- 629 53. Wilson WR, Herbert KE, Mistry Y, Stevens SE, Patel HR, Hastings RA, Thompson MM, Williams B:  
630 Blood leucocyte telomere DNA content predicts vascular telomere DNA content in humans with  
631 and without vascular disease. *European heart journal* 2008, 29(21):2689-2694.
- 632 54. Needham BL, Adler N, Gregorich S, Rehkopf D, Lin J, Blackburn EH, Epel ES: Socioeconomic  
633 status, health behavior, and leukocyte telomere length in the National Health and Nutrition  
634 Examination Survey, 1999-2002. *Social science & medicine (1982)* 2013, 85:1-8.
- 635 55. Shiao SPK, Grayson J, Lie A, Yu CH: Predictors of the Healthy Eating Index and Glycemic Index in  
636 Multi-Ethnic Colorectal Cancer Families. *Nutrients* 2018, 10(6).
- 637 56. Kay MC, Carroll DD, Carlson SA, Fulton JE: Awareness and knowledge of the 2008 Physical  
638 Activity Guidelines for Americans. *Journal of physical activity & health* 2014, 11(4):693-698.
- 639 57. Collaboration GBDO, Ng M, Fleming T, Robinson M, Thomson B, Graetz N, Margono C, Mullany  
640 EC, Biryukov S, Abbafati C et al: Global, regional and national prevalence of overweight and  
641 obesity in children and adults 1980-2013: A systematic analysis. *Lancet (London, England)* 2014,  
642 384(9945):766-781.

643
